# Supplementary material for: Arabidopsis thaliana WAPL Is Essential for the Prophase Removal of Cohesin during Meiosis
Source: PubMed Central journal article supplement (PMC4102442; doi:10.1371/journal.pgen.1004497), 2014-07-17
Supplement: pgen.1004497.s005.pdf [file pgen.1004497.s005.pdf]

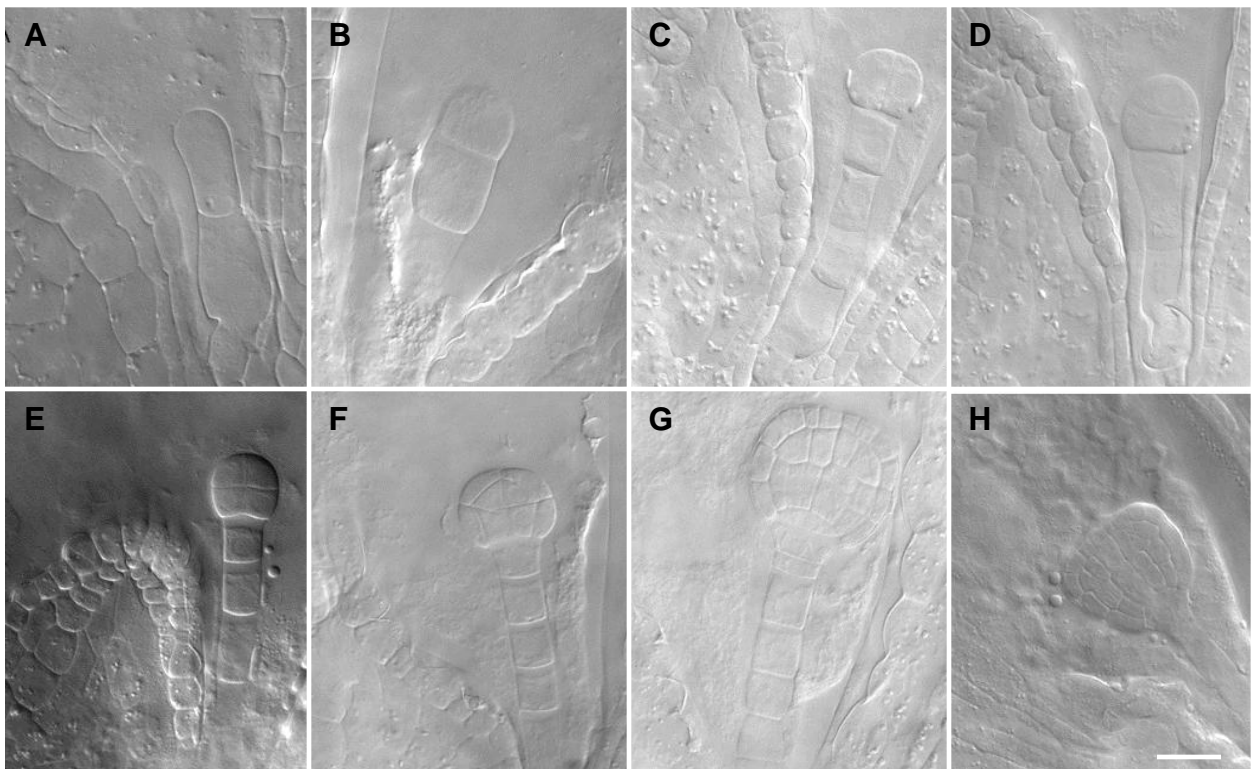

*Atwap1.1wapl2* cleared silique
