# Supplementary material for: Arabidopsis thaliana WAPL Is Essential for the Prophase Removal of Cohesin during Meiosis
Source: PubMed Central journal article supplement (PMC4102442; doi:10.1371/journal.pgen.1004497), 2014-07-17
Supplement: pgen.1004497.s006.pdf [file pgen.1004497.s006.pdf]

**Primers used in this study:**

*WAPL1.1 LP*: CGACGCACTTTCCGTCC

*WAPL1.1 RP*: GAGCCAACGGTCGAGTA

*WAPL1.2 LP*: CGTCGCCGGACATCGAGCC

*WAPL1.2 RP*: GCCCTAATCCTCTTCAG

*WAPL2 LP*: GGTCTCAACAGCTTAACC

*WAPL2 RP*: GAGCGAACTTACGGCCGTCC

*qPCR1 F* : ACATCAATGTCGGGTTCTCA

*qPCR1R* : ACGCTAATCTCCCTGCAAAT

*qPCR 2F*: CACCAGATCTCCGCTTTACA

*qPCR 2R*: GTTTACCAGTAGCCCCAGGA

*CTF7-F*: CTCCTGATTTTCTGGGTTTCC

*CTF7-R*: TTCCAAACTGAATGGAGGTTG

*Lbb1.3* : ATTTTGCCGATTTTCGGAAC
